# Supplementary material for: TFAP2B Influences the Effect of Dietary Fat on Weight Loss under Energy Restriction
Source: PubMed Central journal article supplement (PMC3428346; doi:10.1371/journal.pone.0043212), 2012-08-27
Supplement: pone.0043212.s003.pdf [file pone.0043212.s003.pdf]

**Table S1.** Genotype information of the 55 gene loci included in the study

| Gene            | SNP        | Reference/-s,<br>(first author, year) <sup>+</sup>                            | Trait | Risk-<br>allele | Genotype* |     |     | Hardy-Weinberg |              |
|-----------------|------------|-------------------------------------------------------------------------------|-------|-----------------|-----------|-----|-----|----------------|--------------|
|                 |            |                                                                               |       |                 | NC        | HEZ | HOZ | MAF            | P-<br>value† |
| <i>BDNF</i>     | rs4923461  | Thorleifsson, 2009 [26];<br>Croteau-Chonka, 2011 [27];<br>Speliotes, 2010 [1] | BMI   | A               | 32        | 210 | 385 | 0.22           | 0.6          |
| <i>CADM2</i>    | rs13078807 | Speliotes, 2010 [1]                                                           | BMI   | G               | 392       | 202 | 24  | 0.20           | 0.7          |
| <i>CTNBL1</i>   | rs6013029  | Liu, 2008 [28]                                                                | BMI   | T               | 555       | 77  | 3   | 0.07           | 0.9          |
| <i>ETV5</i>     | rs9816226  | Speliotes, 2010 [1]                                                           | BMI   | T               | 9         | 192 | 423 | 0.17           | 0.01         |
| <i>FANCL</i>    | rs887912   | Speliotes, 2010 [1]                                                           | BMI   | T               | 308       | 264 | 63  | 0.31           | 0.6          |
| <i>FLJ35779</i> | rs2112347  | Speliotes, 2010 [1]                                                           | BMI   | T               | 71        | 289 | 271 | 0.34           | 0.6          |
| <i>GNPDA2</i>   | rs10938397 | Speliotes, 2010 [1]                                                           | BMI   | G               | 198       | 302 | 129 | 0.45           | 0.5          |
| <i>GPRC5B</i>   | rs12444979 | Speliotes, 2010 [1]                                                           | BMI   | C               | 6         | 131 | 492 | 0.12           | 0.4          |
| <i>KCTD15</i>   | rs29941    | Speliotes, 2010 [1]                                                           | BMI   | G               | 53        | 280 | 288 | 0.31           | 0.2          |
| <i>LRP1B</i>    | rs2890652  | Speliotes, 2010 [1]                                                           | BMI   | C               | 448       | 167 | 16  | 0.16           | 0.9          |
| <i>LRRN6C</i>   | rs10968576 | Speliotes, 2010 [1]                                                           | BMI   | G               | 292       | 271 | 62  | 0.32           | 0.9          |
| <i>MAF</i>      | rs1424233  | Meyre, 2009 [32]                                                              | BMI   | A               | 170       | 299 | 151 | 0.48           | 0.4          |
| <i>MAP2K5</i>   | rs2241423  | Speliotes, 2010 [1]                                                           | BMI   | G               | 21        | 224 | 381 | 0.21           | 0.08         |
| <i>MTCH2</i>    | rs10838738 | Willer, 2008 [31];<br>Speliotes, 2010 [1]                                     | BMI   | G               | 250       | 289 | 85  | 0.37           | 0.9          |
| <i>MTIF3</i>    | rs4771122  | Speliotes, 2010 [1]                                                           | BMI   | G               | 359       | 230 | 40  | 0.25           | 0.7          |
| <i>NEGR1</i>    | rs2568958  | Thorleifsson, 2009 [26];<br>Speliotes, 2010 [1]                               | BMI   | A               | 94        | 280 | 253 | 0.37           | 0.3          |
| <i>NPC1</i>     | rs1805081  | Meyre, 2009 [32]                                                              | BMI   | A               | 89        | 292 | 244 | 0.38           | 0.9          |
| <i>NUDT3</i>    | rs206936   | Speliotes, 2010 [1]                                                           | BMI   | G               | 386       | 214 | 32  | 0.22           | 0.7          |
| <i>PCSK1</i>    | rs6235     | Benzinou, 2008 [25]                                                           | BMI   | C               | 368       | 217 | 45  | 0.24           | 0.1          |
| <i>PFKP</i>     | rs6602024  | Scuteri, 2007 [34]                                                            | BMI   | A               | 511       | 110 | 15  | 0.11           | 0.003        |
| <i>PRKD1</i>    | rs11847697 | Speliotes, 2010 [1]                                                           | BMI   | T               | 569       | 66  | 0   | 0.14           | 0.4          |
| <i>PRL</i>      | rs4712652  | Meyre, 2009 [32];<br>Nilsson, 2011 [35]                                       | BMI   | A               | 130       | 286 | 214 | 0.43           | 0.06         |
| <i>PTBP2</i>    | rs1555543  | Speliotes, 2010 [1]                                                           | BMI   | C               | 116       | 318 | 199 | 0.43           | 0.6          |
| <i>PTER</i>     | rs10508503 | Meyre, 2009 [32]                                                              | BMI   | C               | 5         | 93  | 526 | 0.08           | 0.7          |
| <i>QPCTL</i>    | rs2287019  | Speliotes, 2010 [1]                                                           | BMI   | C               | 24        | 189 | 411 | 0.19           | 0.7          |
| <i>RBJ</i>      | rs713586   | Speliotes, 2010 [1]                                                           | BMI   | C               | 172       | 300 | 158 | 0.49           | 0.2          |
| <i>RPL27A</i>   | rs4929949  | Speliotes, 2010 [1]                                                           | BMI   | C               | 157       | 321 | 157 | 0.50           | 0.8          |
| <i>SEC16B</i>   | rs10913469 | Thorleifsson, 2009 [26];<br>Speliotes, 2010 [1]                               | BMI   | C               | 430       | 174 | 22  | 0.17           | 0.4          |
| <i>SH2B1</i>    | rs7498665  | Thorleifsson, 2009 [26];<br>Willer, 2008 [31];<br>Speliotes, 2010 [1]         | BMI   | G               | 220       | 271 | 126 | .42            | 0.01         |
| <i>SLC39A8</i>  | rs13107325 | Speliotes, 2010 [1]                                                           | BMI   | T               | 535       | 88  | 4   | .08            | 0.9          |
| <i>TMEM160</i>  | rs3810291  | Speliotes, 2010 [1]                                                           | BMI   | A               | 60        | 278 | 282 | .32            | 0.5          |
| <i>TMEM18</i>   | rs2867125  | Speliotes, 2010 [1];<br>Thorleifsson, 2009 [26]                               | BMI   | G               | 15        | 158 | 453 | .15            | 0.8          |
| <i>TNNI3K</i>   | rs1514175  | Speliotes, 2010 [1]                                                           | BMI   | A               | 198       | 309 | 121 | .44            | 1.0          |

|                           |            |                                                                          |            |   |     |     |     |     |      |
|---------------------------|------------|--------------------------------------------------------------------------|------------|---|-----|-----|-----|-----|------|
| <i>ZNF608</i>             | rs4836133  | Speliotes, 2010 [1]                                                      | BMI        | A | 190 | 284 | 155 | .47 | 0.02 |
| <i>FAIM2</i>              | rs7138803  | Speliotes, 2010 [1];<br>Thorleifsson, 2009 [26]                          | BMI,<br>WC | A | 244 | 295 | 86  | .37 | 0.8  |
| <i>FTO</i>                | rs9939609  | Frayling, 2007 [29];<br>Speliotes, 2010 [1];<br>Li, 2010 [30]            | BMI,<br>WC | A | 205 | 311 | 102 | .42 | 0.4  |
| <i>MC4R</i>               | rs12970134 | Thorleifsson, 2009 [26] ;<br>Chambers, 2008 [33];<br>Speliotes, 2010 [1] | BMI,<br>WC | A | 298 | 272 | 57  | .31 | 0.7  |
| <i>NRXN3</i>              | rs10146997 | Heard-Costa, 2009 [2];<br>Speliotes, 2010 [1]                            | BMI,<br>WC | G | 390 | 221 | 31  | .22 | 1.0  |
| <i>TFAP2B</i> †           | rs987237   | Speliotes, 2010 [1];<br>Lindgren, 2009 [4]                               | BMI,<br>WC | G | 430 | 186 | 26  | .19 | 0.3  |
| <i>MSRA</i>               | rs545854   | Lindgren, 2009 [4]                                                       | WC         | G | 462 | 161 | 14  | .15 | 1.0  |
| <i>ADAMTS9</i>            | rs6795735  | Heid, 2010 [3]                                                           | WHR        | C | 126 | 313 | 188 | .45 | 0.8  |
| <i>CPEB4</i>              | rs6861681  | Heid, 2010 [3]                                                           | WHR        | A | 320 | 261 | 53  | .29 | 1.0  |
| <i>DNM3-<br/>PIGC</i>     | rs1011731  | Heid, 2010 [3]                                                           | WHR        | G | 235 | 283 | 102 | .39 | 0.3  |
| <i>GRB14</i>              | rs10195252 | Heid, 2010 [3]                                                           | WHR        | T | 110 | 283 | 230 | .40 | 0.2  |
| <i>HOXC13</i>             | rs1443512  | Heid, 2010 [3]                                                           | WHR        | A | 359 | 238 | 29  | .24 | 0.2  |
| <i>ITPR2-<br/>SSPN</i>    | rs718314   | Heid, 2010 [3]                                                           | WHR        | G | 350 | 223 | 46  | .25 | 0.2  |
| <i>LYPLAL1</i>            | rs2605100  | Lindgren, 2009 [4]                                                       | WHR        | G | 62  | 262 | 303 | .31 | 0.6  |
| <i>LYPLAL1</i>            | rs4846567  | Heid, 2010 [3]                                                           | WHR        | G | 56  | 267 | 312 | .30 | 0.9  |
| <i>LY86</i>               | rs1294421  | Heid, 2010 [3]                                                           | WHR        | G | 96  | 281 | 263 | .37 | 0.1  |
| <i>NFE2L3</i>             | rs1055144  | Heid, 2010 [3]                                                           | WHR        | T | 413 | 191 | 23  | .19 | 0.9  |
| <i>NISCH-<br/>STAB1</i>   | rs6784615  | Heid, 2010 [3]                                                           | WHR        | T | 2   | 66  | 567 | .06 | 1.0  |
| <i>RSPO3</i>              | rs9491696  | Heid, 2010 [3]                                                           | WHR        | G | 168 | 292 | 164 | .50 | 0.1  |
| <i>TBX15-<br/>WARS2</i>   | rs984222   | Heid, 2010 [3]                                                           | WHR        | G | 111 | 302 | 224 | .41 | 0.6  |
| <i>VEGFA</i>              | rs6905288  | Heid, 2010 [3]                                                           | WHR        | A | 122 | 325 | 191 | .45 | 0.4  |
| <i>ZNRF3-<br/>KREMEN1</i> | rs4823006  | Heid, 2010 [3]                                                           | WHR        | A | 110 | 315 | 211 | .42 | 0.7  |

freq; frequency  
 BMI; body mass index  
 WC; waist circumference  
 WHR; waist-to-hip ratio  
 MAF; minor allele frequency

\*Surrogate (linked) SNPs: rs4923461 (Speliotes - rs10767664), rs10838738 (Speliotes - rs3817334), rs2568958 (Speliotes - rs2815752), rs10913469 (Speliotes - rs543874), rs7498665 (Speliotes - rs7359397), rs2867125 (Thorleifsson - rs7561317), rs9939609 (Speliotes - rs1558902; Li - rs1121980), rs12970134 (Speliotes - rs571312), rs10146997 (Speliotes - rs10150332)

\*With respect to the obesity trait risk-allele. NC/HEZ/HOZ; noncarriers/heterozygotes/homozygotes

†Fisher's exact test.

‡Numbers in DiOGenes for the five last columns were: 435, 188, 21, 0.18, and 0.9.
