# Supplementary material for: TFAP2B Influences the Effect of Dietary Fat on Weight Loss under Energy Restriction
Source: PubMed Central journal article supplement (PMC3428346; doi:10.1371/journal.pone.0043212), 2012-08-27
Supplement: pone.0043212.s004.pdf [file pone.0043212.s004.pdf]

**Table S2.** Gene and gene-diet interaction effects with  $P < 0.01^*$  in relation to change in weight or waist

| Gene†         | Effect                                              | Effect size reading                                                      | Effect size, beta (95% confidence interval) |                             |                             |
|---------------|-----------------------------------------------------|--------------------------------------------------------------------------|---------------------------------------------|-----------------------------|-----------------------------|
|               |                                                     |                                                                          | Non-carrier                                 | Heterozygote                | Homozygote‡                 |
| <i>VEGFA</i>  | Gene effect on weight change, $P=0.001$             | Weight change, kg, by genotype using non-carriers as reference           | $n=122$<br>0 (reference)                    | $n=325$<br>0.5 (-0.2; 1.1)  | $n=191$<br>1.2 (0.4; 1.9)   |
| <i>CTNBL1</i> | Gene × fat group effect on waist change, $P=0.0003$ | Waist change, cm, for high-fat versus low-fat diet in groups of genotype | $n=543$<br>0.8 (0.1; 1.5)                   | $n=75$<br>-2.7 (-4.5; -0.9) | $n=3$<br>Non-applicable     |
| <i>NPC1</i>   | Gene × fat group effect on waist change, $P=0.008$  | Waist change, cm, for high-fat versus low-fat diet in groups of genotype | $n=87$<br>2.1 (0.7; 3.5)                    | $n=284$<br>0.8 (0.1; 1.5)   | $n=240$<br>-0.6 (-1.6; 0.5) |

\*Results for *TFAP2B* × fat group effects are presented separately in Figure 2-3.

†SNP information in Table S1.

‡Homozygous for the obesity trait risk-allele.
