# Supplementary material for: TFAP2B Influences the Effect of Dietary Fat on Weight Loss under Energy Restriction
Source: PubMed Central journal article supplement (PMC3428346; doi:10.1371/journal.pone.0043212), 2012-08-27
Supplement: pone.0043212.s005.pdf [file pone.0043212.s005.pdf]

**Table S3.** *P*-value for interaction between *TFAP2B* and fat group, and beta (95% confidence interval) for fat group by *TFAP2B* variant\*, in relation to weight loss, in analyses varying in fat group definition and adjustments, in NUGENOB.

| Weight loss effect <sup>†</sup> | A.<br>Original analyses of randomized fat group ( <i>n</i> =642) | B.<br>Same as A but only including participants as in case C ( <i>n</i> =580) | C.<br>Same as A but including adjustment for baseline fat% intake and change in energy intake ( <i>n</i> =580) | D.<br>Same as A but only including participants as in case E ( <i>n</i> =519) | E.<br>Analyses of reported fat% intake during the intervention of >35 versus <30 ( <i>n</i> =519) |
|---------------------------------|------------------------------------------------------------------|-------------------------------------------------------------------------------|----------------------------------------------------------------------------------------------------------------|-------------------------------------------------------------------------------|---------------------------------------------------------------------------------------------------|
| <i>P</i> -value                 | 0.00007                                                          | 0.0001                                                                        | 0.00007                                                                                                        | 0.005                                                                         | 0.008                                                                                             |
| Beta:<br>AA                     | 0.99 (0.40; 1.58)                                                | 1.15 (0.53; 1.77)                                                             | 1.08 (0.46; 1.69)                                                                                              | 1.06 (0.41; 1.71)                                                             | 0.99 (0.37; 1.61)                                                                                 |
| Beta:<br>AG                     | -0.80(-1.54;-0.06)                                               | -0.67 (-1.43; 0.10)                                                           | -0.78 (-1.54; -0.02)                                                                                           | -0.35 (-1.18; 0.48)                                                           | -0.15 (-0.95; 0.66)                                                                               |

\*Results are not reported for the rare GG variant because results were not applicable in this group after further sample size reduction in analyses B-E.

<sup>†</sup>*P*-value for interaction between *TFAP2B* and fat group; beta; estimates for comparison between the high-fat versus the low-fat group.
