# Supplementary material for: TFAP2B Influences the Effect of Dietary Fat on Weight Loss under Energy Restriction
Source: PubMed Central journal article supplement (PMC3428346; doi:10.1371/journal.pone.0043212), 2012-08-27
Supplement: pone.0043212.s006.pdf [file pone.0043212.s006.pdf]

**Table S4.** *P*-value for interaction between *TFAP2B* and fat group, and beta (95% confidence interval) for fat group by *TFAP2B* variant\*, in relation to weight loss, in analyses varying in fat group definition and adjustments, in DiOGenes.

| <b>Weight loss effect*</b> | <b>A.</b><br><b>Original analyses of fat% change group, using the median cut-off (n=590)</b> | <b>B.</b><br><b>Same as in case A but also including adjustment for change in energy intake (n=590)</b> | <b>C.</b><br><b>Analyses of tertile 3 versus 1 of change in fat% intake (n=288)</b> |
|----------------------------|----------------------------------------------------------------------------------------------|---------------------------------------------------------------------------------------------------------|-------------------------------------------------------------------------------------|
| <i>P</i> -value            | 0.4                                                                                          | 0.4                                                                                                     | 0.2                                                                                 |
| Beta:                      |                                                                                              |                                                                                                         |                                                                                     |
| AA                         | 0.09 (-0.50; 0.68)                                                                           | 0.07 (-0.52; 0.66)                                                                                      | 0.44 (-0.44; 1.31)                                                                  |
| Beta:                      |                                                                                              |                                                                                                         |                                                                                     |
| AG                         | -0.29 (-1.04; 0.46)                                                                          | -0.31 (-1.07; 0.44)                                                                                     | -0.37 (-1.44; 0.70)                                                                 |

\*Results are not reported for the rare GG variant because results were not applicable in this group, particularly after further sample size reduction in analysis C.

† *P*-value for interaction between *TFAP2B* and fat group; beta; estimates for comparison between the low versus high fat% decrease group.
